# Supplementary material for: Bruton's agammaglobulinemia tyrosine kinase (Btk) regulates TPA-induced breast cancer cell invasion via PLCγ2/PKCβ/NF-κB/AP-1-dependent matrix metalloproteinase-9 activation
Source: PubMed Central journal article supplement — Oncol Rep. 2021 Mar 9;45(5):56. doi: 10.3892/or.2021.8007 (PMC7962096; doi:10.3892/or.2021.8007), 2021-03-09

Figure S1. Effect of BTK inhibitors on MMP-2 and MMP-9 expression and migration/invasion in MDA-MB-231 cells. (A) MDA-MB-231 cells ( $7 \times 10^5$ ) were treated with BTK inhibitors for 24 h. Cell lysates were analyzed by western blotting using an anti-MMP-2, -9 antibody. The blot was reprobated with an anti- $\beta$ -actin antibody to confirm equal loading. (B) Transwell migration and invasion assays (magnification,  $\times 10$ ) were performed to investigate the effects of BTK on the migration and invasion abilities of MDA-MB-231 cells. Invasion and Migration assays were performed as described in Materials and methods \* $P < 0.005$  vs. untreated control.

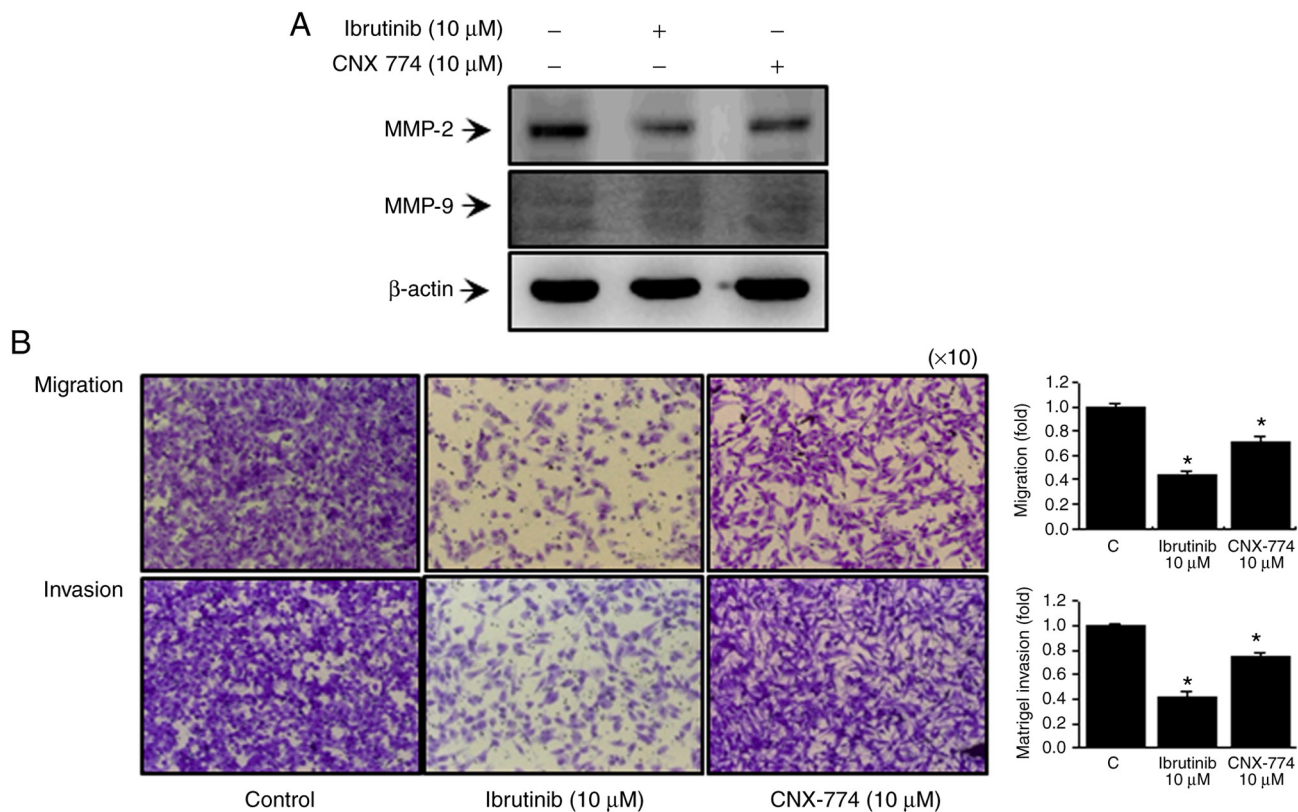

Supplement: Supplementary_Data.pdf [file Supplementary_Data.pdf]
